# Supplementary material for: Low-Frequency Mutational Heterogeneity of Invasive Ductal Carcinoma Subtypes: Information to Direct Precision Oncology
Source: PubMed Central journal article supplement (PMC6429455; doi:10.3390/ijms20051011), 2019-02-26
Supplement: ijms-20-01011-s001.pdf [file ijms-20-01011-s001.pdf]

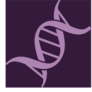

# **Supplementary Materials: Low-frequency mutational heterogeneity of invasive ductal carcinoma subtypes: information to direct precision oncology**

Meagan B. Myers \*, Karen L. McKim, Malathi Banda, Nysia I. George and Barbara L. Parsons

**Table S1A** *PIK3CA*, *KRAS*, *HRAS*, and *BRAF* mutant fraction measurements in HR+/HER2+ ductal carcinomas

| ID               | Age/Race | Max. Tumor<br>Dim. | T Stage   N Stage  <br>Hist. Grade   Clinical Stage | Smoker | MP   | Mutant Fraction          |                         |                         |                         |                         |                         |
|------------------|----------|--------------------|-----------------------------------------------------|--------|------|--------------------------|-------------------------|-------------------------|-------------------------|-------------------------|-------------------------|
|                  |          |                    |                                                     |        |      | <i>PIK3CA</i>            |                         | <i>KRAS</i>             |                         | <i>HRAS</i>             | <i>BRAF</i>             |
|                  |          |                    |                                                     |        |      | H1047R                   | E545K                   | G12D                    | G12V                    | G12D                    | V600E                   |
| 1                | 40/C     | 1.8                | T1   N1   II   II                                   | N      | Pre  | 1.99 x 10 <sup>-6</sup>  | 6.99 x 10 <sup>-6</sup> | 3.37 x 10 <sup>-6</sup> | 5.88 x 10 <sup>-7</sup> | 4.94 x 10 <sup>-5</sup> | 1.72 x 10 <sup>-5</sup> |
| 2                | 85/C     | 3.2                | T4   N0   III   III                                 | -      | Post | 1.16 x 10 <sup>-7</sup>  | 4.37 x 10 <sup>-6</sup> | 3.22 x 10 <sup>-5</sup> | 2.29 x 10 <sup>-6</sup> | 7.26 x 10 <sup>-6</sup> | 5.71 x 10 <sup>-6</sup> |
| 3                | 56/C     | 4.2                | T4   N2   II   III                                  | -      | Post | 1.11 x 10 <sup>-7</sup>  | 4.06 x 10 <sup>-6</sup> | 4.23 x 10 <sup>-5</sup> | 2.57 x 10 <sup>-7</sup> | 1.14 x 10 <sup>-5</sup> | 8.62 x 10 <sup>-6</sup> |
| 4                | 69/C     | 1.2                | T1   N-   II   -                                    | N      | Post | 9.21 x 10 <sup>-3</sup>  | 1.32 x 10 <sup>-1</sup> | 1.56 x 10 <sup>-5</sup> | 1.06 x 10 <sup>-4</sup> | 1.44 x 10 <sup>-6</sup> | 2.07 x 10 <sup>-5</sup> |
| 5                | 43/C     | 1.9                | T1   N0   II   I                                    | -      | Pre  | 9.87 x 10 <sup>-5</sup>  | 6.10 x 10 <sup>-6</sup> | 9.09 x 10 <sup>-6</sup> | 1.48 x 10 <sup>-6</sup> | 6.02 x 10 <sup>-6</sup> | 1.74 x 10 <sup>-5</sup> |
| 6                | 42/C     | 1.5                | T1   N0   II   I                                    | -      | -    | 1.08 x 10 <sup>-7</sup>  | 1.36 x 10 <sup>-5</sup> | 1.91 x 10 <sup>-5</sup> | 3.65 x 10 <sup>-7</sup> | 3.00 x 10 <sup>-5</sup> | 4.99 x 10 <sup>-6</sup> |
| 7                | 47/C     | 1.2                | T1   N0   II   I                                    | -      | Pre  | 9.58 x 10 <sup>-6</sup>  | 1.08 x 10 <sup>-5</sup> | 7.13 x 10 <sup>-6</sup> | 1.98 x 10 <sup>-7</sup> | 3.24 x 10 <sup>-5</sup> | 5.71 x 10 <sup>-6</sup> |
| 8                | 56/C     | 1.5                | T1   N2   II   III                                  | -      | Pre  | 1.14 x 10 <sup>-7</sup>  | 9.75 x 10 <sup>-6</sup> | 1.27 x 10 <sup>-5</sup> | 1.65 x 10 <sup>-6</sup> | 9.73 x 10 <sup>-6</sup> | 1.09 x 10 <sup>-5</sup> |
| 9                | 60/C     | 2.5                | T2   N0   II   II                                   | N      | Post | 4.50 x 10 <sup>-8</sup>  | 1.61 x 10 <sup>-5</sup> | 1.51 x 10 <sup>-5</sup> | 1.81 x 10 <sup>-6</sup> | 1.38 x 10 <sup>-6</sup> | 8.57 x 10 <sup>-6</sup> |
| 10               | 66/C     | 1.2                | T1   N1   III   II                                  | -      | Post | 3.64 x 10 <sup>-4</sup>  | 7.40 x 10 <sup>-6</sup> | 1.06 x 10 <sup>-5</sup> | 4.13 x 10 <sup>-7</sup> | 9.00 x 10 <sup>-7</sup> | 4.72 x 10 <sup>-6</sup> |
| 11               | 54/C     | 1.2                | T1   N0   III   I                                   | -      | -    | 2.69 x 10 <sup>-5</sup>  | 2.79 x 10 <sup>-5</sup> | 2.39 x 10 <sup>-5</sup> | 8.12 x 10 <sup>-6</sup> | 7.95 x 10 <sup>-5</sup> | 3.73 x 10 <sup>-5</sup> |
| 12               | 60/C     | 2.0                | T1   N1   II   II                                   | N      | Post | 1.01 x 10 <sup>-3</sup>  | 3.67 x 10 <sup>-6</sup> | 6.96 x 10 <sup>-6</sup> | 8.89 x 10 <sup>-7</sup> | 1.31 x 10 <sup>-4</sup> | 7.35 x 10 <sup>-6</sup> |
| 13               | 58/C     | 1.5                | T1   N0   II   I                                    | -      | Post | 4.72 x 10 <sup>-6</sup>  | 3.03 x 10 <sup>-5</sup> | 1.46 x 10 <sup>-5</sup> | 1.98 x 10 <sup>-6</sup> | 8.53 x 10 <sup>-5</sup> | 7.36 x 10 <sup>-6</sup> |
| 14               | 27/C     | 1.5                | T1   N0   III   I                                   | -      | Pre  | 2.15 x 10 <sup>-4</sup>  | 1.27 x 10 <sup>-1</sup> | 1.10 x 10 <sup>-5</sup> | 3.05 x 10 <sup>-6</sup> | 7.28 x 10 <sup>-5</sup> | 1.62 x 10 <sup>-5</sup> |
| 15               | 60/C     | 2.5                | T2   N0   II   II                                   | N      | Post | 4.15 x 10 <sup>-2</sup>  | 7.34 x 10 <sup>-6</sup> | 1.26 x 10 <sup>-5</sup> | 1.97 x 10 <sup>-6</sup> | 8.51 x 10 <sup>-5</sup> | 8.83 x 10 <sup>-5</sup> |
| 16               | 77/C     | 2.5                | T2   N1   III   II                                  | N      | Post | 2.55 x 10 <sup>-7</sup>  | 7.56 x 10 <sup>-6</sup> | 1.59 x 10 <sup>-6</sup> | 1.81 x 10 <sup>-5</sup> | 4.14 x 10 <sup>-5</sup> | 4.36 x 10 <sup>-5</sup> |
| 17               | 50/C     | 2.7                | T2   N0   II   II                                   | N      | Post | 1.14 x 10 <sup>-3</sup>  | 4.72 x 10 <sup>-6</sup> | 1.78 x 10 <sup>-5</sup> | 2.13 x 10 <sup>-6</sup> | 8.57 x 10 <sup>-5</sup> | 9.79 x 10 <sup>-6</sup> |
| 18               | 50/C     | 1.4                | T1   N0   II   I                                    | -      | Pre  | 2.58 x 10 <sup>-5</sup>  | 1.09 x 10 <sup>-5</sup> | 1.72 x 10 <sup>-5</sup> | 1.67 x 10 <sup>-6</sup> | 1.67 x 10 <sup>-5</sup> | 7.38 x 10 <sup>-6</sup> |
| 19               | 66/C     | 5.0                | T2   N0   II   II                                   | N      | Post | 2.17 x 10 <sup>-8</sup>  | 2.04 x 10 <sup>-1</sup> | 1.10 x 10 <sup>-5</sup> | 1.54 x 10 <sup>-6</sup> | 8.86 x 10 <sup>-6</sup> | 8.17 x 10 <sup>-6</sup> |
| 20               | 49/C     | 4.7                | T2   N2   II   III                                  | Y      | Pre  | 2.88 x 10 <sup>-3</sup>  | 4.68 x 10 <sup>-6</sup> | 3.57 x 10 <sup>-5</sup> | 2.96 x 10 <sup>-6</sup> | 2.19 x 10 <sup>-4</sup> | 1.17 x 10 <sup>-5</sup> |
| <b>Mean ± SD</b> |          |                    |                                                     |        |      | <b>Geometric Mean MF</b> |                         |                         |                         |                         |                         |
| 55.8 ± 13.3      |          |                    |                                                     |        |      | 1.32 x 10 <sup>-5</sup>  | 3.66 x 10 <sup>-5</sup> | 1.79 x 10 <sup>-5</sup> | 1.80 x 10 <sup>-6</sup> | 2.09 x 10 <sup>-5</sup> | 1.19 x 10 <sup>-5</sup> |

**Table S1B.** *PIK3CA*, *KRAS*, *HRAS*, and *BRAF* mutant fraction measurements in HR+/HER2- ductal carcinomas

| ID               | Age/Race | Max.<br>Tumor Dim. | T Stage   N Stage  <br>Hist. Grade   Clinical Stage | Smoker | MP   | Mutant Fraction          |                         |                         |                         |                         |                         |
|------------------|----------|--------------------|-----------------------------------------------------|--------|------|--------------------------|-------------------------|-------------------------|-------------------------|-------------------------|-------------------------|
|                  |          |                    |                                                     |        |      | <i>PIK3CA</i>            |                         | <i>KRAS</i>             |                         | <i>HRAS</i>             | <i>BRAF</i>             |
|                  |          |                    |                                                     |        |      | H1047R                   | E545K                   | G12D                    | G12V                    | G12D                    | V600E                   |
| 21               | 58/AA    | 15.7               | T3   N3   II   III                                  | Y      | -    | 1.55 x 10 <sup>-7</sup>  | 4.91 x 10 <sup>-6</sup> | 8.32 x 10 <sup>-6</sup> | 2.76 x 10 <sup>-7</sup> | 3.66 x 10 <sup>-5</sup> | 7.46 x 10 <sup>-4</sup> |
| 22               | 63/C     | 1.9                | T1   N2   II   III                                  | N      | Post | 9.45 x 10 <sup>-8</sup>  | 1.92 x 10 <sup>-6</sup> | 3.55 x 10 <sup>-6</sup> | 2.29 x 10 <sup>-7</sup> | 3.16 x 10 <sup>-5</sup> | 5.01 x 10 <sup>-5</sup> |
| 23               | 65/C     | 5.8                | T3   N2   II   III                                  | Y      | Post | 6.92 x 10 <sup>-3</sup>  | 6.71 x 10 <sup>-5</sup> | 3.50 x 10 <sup>-6</sup> | 1.19 x 10 <sup>-7</sup> | 4.15 x 10 <sup>-5</sup> | 1.67 x 10 <sup>-4</sup> |
| 24               | 56/C     | 3.9                | T2   N1   II   II                                   | Y      | -    | 3.88 x 10 <sup>-3</sup>  | 7.09 x 10 <sup>-6</sup> | 6.62 x 10 <sup>-5</sup> | 2.36 x 10 <sup>-6</sup> | 4.21 x 10 <sup>-5</sup> | 1.85 x 10 <sup>-5</sup> |
| 25               | 61/C     | 2.7                | T2   N0   III   II                                  | N      | Post | 2.80 x 10 <sup>-7</sup>  | 1.14 x 10 <sup>-5</sup> | 8.17 x 10 <sup>-6</sup> | 6.53 x 10 <sup>-7</sup> | 4.11 x 10 <sup>-5</sup> | 8.19 x 10 <sup>-5</sup> |
| 26               | 67/C     | 4.0                | T2   N3   III   III                                 | N      | Post | 8.74 x 10 <sup>-5</sup>  | 5.79 x 10 <sup>-6</sup> | 4.71 x 10 <sup>-6</sup> | 1.45 x 10 <sup>-7</sup> | 6.03 x 10 <sup>-5</sup> | 5.32 x 10 <sup>-5</sup> |
| 27               | 70/C     | 2.5                | T2   N1   III   II                                  | N      | -    | 2.53 x 10 <sup>-5</sup>  | 3.00 x 10 <sup>-3</sup> | 1.31 x 10 <sup>-5</sup> | 1.48 x 10 <sup>-7</sup> | 2.26 x 10 <sup>-5</sup> | 1.85 x 10 <sup>-5</sup> |
| 28               | 30/C     | 2.2                | T2   N1   I   II                                    | Y      | Pre  | 3.85 x 10 <sup>-8</sup>  | 3.61 x 10 <sup>-3</sup> | 5.31 x 10 <sup>-6</sup> | 3.43 x 10 <sup>-7</sup> | 5.68 x 10 <sup>-5</sup> | 3.49 x 10 <sup>-5</sup> |
| 29               | 57/AA    | 3.5                | T2   N0   III   II                                  | N      | Post | 2.06 x 10 <sup>-7</sup>  | 1.87 x 10 <sup>-5</sup> | 9.07 x 10 <sup>-6</sup> | 5.50 x 10 <sup>-7</sup> | 1.29 x 10 <sup>-5</sup> | 9.20 x 10 <sup>-5</sup> |
| 30               | 68/C     | 3.2                | T2   N0   III   II                                  | Y      | Post | 2.29 x 10 <sup>-6</sup>  | 1.56 x 10 <sup>-6</sup> | 1.66 x 10 <sup>-6</sup> | 1.02 x 10 <sup>-7</sup> | 2.32 x 10 <sup>-5</sup> | 4.45 x 10 <sup>-5</sup> |
| 31               | 69/S.Am. | 4.5                | T2   N2   II   III                                  | N      | Post | 1.38 x 10 <sup>-6</sup>  | 6.60 x 10 <sup>-6</sup> | 3.01 x 10 <sup>-6</sup> | 3.28 x 10 <sup>-5</sup> | 3.87 x 10 <sup>-5</sup> | 7.41 x 10 <sup>-5</sup> |
| 32               | 49/?     | 4.5                | T2   N3   I   III                                   | Y      | Pre  | 2.06 x 10 <sup>-7</sup>  | 4.52 x 10 <sup>-7</sup> | 2.01 x 10 <sup>-5</sup> | 5.28 x 10 <sup>-7</sup> | 6.15 x 10 <sup>-4</sup> | 2.46 x 10 <sup>-5</sup> |
| 33               | 55/C     | 3.5                | T2   N0   III   II                                  | N      | Post | 6.65 x 10 <sup>-2</sup>  | 5.07 x 10 <sup>-6</sup> | 2.57 x 10 <sup>-6</sup> | 4.68 x 10 <sup>-8</sup> | 1.69 x 10 <sup>-5</sup> | 1.90 x 10 <sup>-5</sup> |
| 34               | 53/C     | 4.8                | T2   N0   I   II                                    | N      | Post | 3.17 x 10 <sup>-2</sup>  | 2.48 x 10 <sup>-3</sup> | 1.29 x 10 <sup>-5</sup> | 2.95 x 10 <sup>-8</sup> | 1.68 x 10 <sup>-5</sup> | 2.32 x 10 <sup>-5</sup> |
| 35               | 42/C     | 3.2                | T2   N2   III   III                                 | N      | -    | 1.82 x 10 <sup>-4</sup>  | 4.95 x 10 <sup>-7</sup> | 4.70 x 10 <sup>-6</sup> | 1.26 x 10 <sup>-7</sup> | 8.27 x 10 <sup>-5</sup> | 3.18 x 10 <sup>-5</sup> |
| 36               | 28/AA    | 2.7                | T2   N0   I   II                                    | N      | Pre  | 5.11 x 10 <sup>-8</sup>  | 6.82 x 10 <sup>-6</sup> | 6.04 x 10 <sup>-6</sup> | 6.21 x 10 <sup>-7</sup> | 1.10 x 10 <sup>-5</sup> | 1.80 x 10 <sup>-5</sup> |
| 37               | 65/C     | 2.5                | T2   N0   II   II                                   | N      | Post | 7.43 x 10 <sup>-4</sup>  | 5.35 x 10 <sup>-6</sup> | 7.22 x 10 <sup>-6</sup> | 6.39 x 10 <sup>-8</sup> | 1.25 x 10 <sup>-5</sup> | 2.58 x 10 <sup>-4</sup> |
| 38               | 86/AA    | 10.5               | T3   N2   -   III                                   | -      | Post | 6.20 x 10 <sup>-8</sup>  | 4.66 x 10 <sup>-6</sup> | 9.06 x 10 <sup>-6</sup> | 3.96 x 10 <sup>-8</sup> | 1.29 x 10 <sup>-5</sup> | 5.33 x 10 <sup>-5</sup> |
| 39               | 49/C     | 4.2                | T2   N0   II   II                                   | N      | Pre  | 2.40 x 10 <sup>-4</sup>  | 1.56 x 10 <sup>-1</sup> | 3.30 x 10 <sup>-5</sup> | 5.59 x 10 <sup>-7</sup> | 6.10 x 10 <sup>-5</sup> | 7.36 x 10 <sup>-5</sup> |
| 40               | 38/C     | 1.4                | T3   N3   II   III                                  | Y      | -    | 1.42 x 10 <sup>-5</sup>  | 3.35 x 10 <sup>-5</sup> | 7.81 x 10 <sup>-6</sup> | 3.89 x 10 <sup>-6</sup> | 1.11 x 10 <sup>-4</sup> | 7.91 x 10 <sup>-6</sup> |
| <b>Mean ± SD</b> |          |                    |                                                     |        |      | <b>Geometric Mean MF</b> |                         |                         |                         |                         |                         |
| 56.5 ± 14.2      |          |                    |                                                     |        |      | 1.20 x 10 <sup>-5</sup>  | 2.29 x 10 <sup>-5</sup> | 7.43 x 10 <sup>-6</sup> | 3.05 x 10 <sup>-7</sup> | 3.59 x 10 <sup>-5</sup> | 4.84 x 10 <sup>-5</sup> |

**Table S1C.** *PIK3CA*, *KRAS*, *HRAS*, and *BRAF* mutant fraction measurements in HR-/HER2+ ductal carcinomas

| ID               | Age/Race | Max. Tumor<br>Dim. | T Stage   N Stage  <br>Hist. Grade   Clinical Stage | Smoker | MP   | Mutant Fraction          |                         |                         |                         |                         |                         |
|------------------|----------|--------------------|-----------------------------------------------------|--------|------|--------------------------|-------------------------|-------------------------|-------------------------|-------------------------|-------------------------|
|                  |          |                    |                                                     |        |      | <i>PIK3CA</i>            |                         | <i>KRAS</i>             |                         | <i>HRAS</i>             | <i>BRAF</i>             |
|                  |          |                    |                                                     |        |      | H1047R                   | E545K                   | G12D                    | G12V                    | G12D                    | V600E                   |
| 41               | 48/C     | 3.4                | T2   N1   III   II                                  | N      | Pre  | 1.54 x 10 <sup>-7</sup>  | 4.08 x 10 <sup>-6</sup> | 5.33 x 10 <sup>-6</sup> | 1.90 x 10 <sup>-7</sup> | 3.18 x 10 <sup>-5</sup> | 9.95 x 10 <sup>-5</sup> |
| 42               | 48/C     | 1.9                | T1   N0   III   I                                   | -      | Pre  | 9.67 x 10 <sup>-9</sup>  | 2.98 x 10 <sup>-6</sup> | 3.10 x 10 <sup>-6</sup> | 5.51 x 10 <sup>-8</sup> | 1.08 x 10 <sup>-5</sup> | 1.73 x 10 <sup>-5</sup> |
| 43               | 85/AA    | 1.8                | T1   N1   III   I                                   | Y      | Post | 1.67 x 10 <sup>-4</sup>  | 3.37 x 10 <sup>-6</sup> | 7.30 x 10 <sup>-6</sup> | 2.08 x 10 <sup>-5</sup> | 2.83 x 10 <sup>-5</sup> | 3.80 x 10 <sup>-5</sup> |
| 44               | 53/C     | 3.5                | T2   N0   III   II                                  | Y      | Post | 6.84 x 10 <sup>-2</sup>  | 1.50 x 10 <sup>-5</sup> | 2.56 x 10 <sup>-5</sup> | 7.72 x 10 <sup>-7</sup> | 5.36 x 10 <sup>-5</sup> | 5.42 x 10 <sup>-6</sup> |
| 45               | 60/C     | 1.5                | T1   N1   -   II                                    | N      | Post | 4.29 x 10 <sup>-6</sup>  | 4.58 x 10 <sup>-6</sup> | 8.27 x 10 <sup>-5</sup> | 2.44 x 10 <sup>-6</sup> | 4.44 x 10 <sup>-5</sup> | 4.94 x 10 <sup>-6</sup> |
| 46               | 54/C     | 1.6                | T1   N-   III   I                                   | N      | Post | 1.19 x 10 <sup>-7</sup>  | 3.54 x 10 <sup>-6</sup> | 1.51 x 10 <sup>-1</sup> | 2.58 x 10 <sup>-4</sup> | 2.14 x 10 <sup>-5</sup> | 5.45 x 10 <sup>-6</sup> |
| 47               | 55/C     | 0.6                | T1   N0   III   I                                   | -      | Post | 8.60 x 10 <sup>-5</sup>  | 2.93 x 10 <sup>-6</sup> | 4.04 x 10 <sup>-5</sup> | 1.81 x 10 <sup>-4</sup> | 1.66 x 10 <sup>-5</sup> | 8.16 x 10 <sup>-6</sup> |
| 48               | 53/C     | 1.2                | T1   N2   II   III                                  | -      | Post | 7.92 x 10 <sup>-7</sup>  | 5.83 x 10 <sup>-6</sup> | 1.77 x 10 <sup>-5</sup> | 2.75 x 10 <sup>-6</sup> | 2.04 x 10 <sup>-5</sup> | 5.42 x 10 <sup>-6</sup> |
| 49               | 57/C     | 2.4                | T2   N0   III   II                                  | -      | Post | 5.71 x 10 <sup>-8</sup>  | 7.77 x 10 <sup>-6</sup> | 5.12 x 10 <sup>-5</sup> | 1.48 x 10 <sup>-7</sup> | 1.29 x 10 <sup>-5</sup> | 5.93 x 10 <sup>-6</sup> |
| 50               | 43/C     | 1.2                | T1   N0   -   I                                     | -      | Post | 2.28 x 10 <sup>-6</sup>  | 4.19 x 10 <sup>-6</sup> | 5.05 x 10 <sup>-4</sup> | 2.78 x 10 <sup>-6</sup> | 1.17 x 10 <sup>-5</sup> | 5.26 x 10 <sup>-6</sup> |
| 51               | 62/C     | 2.5                | T2   N1   III   II                                  | N      | Post | 5.94 x 10 <sup>-8</sup>  | 3.92 x 10 <sup>-6</sup> | 2.36 x 10 <sup>-5</sup> | 4.56 x 10 <sup>-5</sup> | 2.46 x 10 <sup>-5</sup> | 6.34 x 10 <sup>-6</sup> |
| 52               | 55/C     | 1.7                | T1   N0   II   I                                    | Y      | Post | 8.32 x 10 <sup>-4</sup>  | 7.23 x 10 <sup>-6</sup> | 6.80 x 10 <sup>-5</sup> | 3.93 x 10 <sup>-6</sup> | 1.48 x 10 <sup>-5</sup> | 1.54 x 10 <sup>-5</sup> |
| 53               | 50/C     | 2.5                | T2   N1   III   II                                  | -      | Post | 7.60 x 10 <sup>-8</sup>  | 4.46 x 10 <sup>-6</sup> | 5.17 x 10 <sup>-5</sup> | 1.98 x 10 <sup>-6</sup> | 9.17 x 10 <sup>-5</sup> | 1.56 x 10 <sup>-5</sup> |
| 54               | 51/C     | 2.2                | T2   N0   III   II                                  | N      | Post | 3.80 x 10 <sup>-5</sup>  | 7.02 x 10 <sup>-6</sup> | 1.68 x 10 <sup>-5</sup> | 1.27 x 10 <sup>-6</sup> | 6.24 x 10 <sup>-5</sup> | 8.00 x 10 <sup>-5</sup> |
| 55               | 44/C     | 2.5                | T2   N2   III   III                                 | N      | Pre  | 2.37 x 10 <sup>-6</sup>  | 1.34 x 10 <sup>-1</sup> | 1.07 x 10 <sup>-5</sup> | 3.89 x 10 <sup>-7</sup> | 4.11 x 10 <sup>-6</sup> | 8.63 x 10 <sup>-6</sup> |
| 56               | 72/C     | 1.7                | T1   N0   II   I                                    | N      | Post | 3.80 x 10 <sup>-2</sup>  | 1.66 x 10 <sup>-7</sup> | 4.36 x 10 <sup>-5</sup> | 5.02 x 10 <sup>-6</sup> | 2.38 x 10 <sup>-6</sup> | 1.16 x 10 <sup>-5</sup> |
| 57               | 71/C     | 3.0                | T2   N2   III   III                                 | N      | Post | 2.36 x 10 <sup>-6</sup>  | 5.52 x 10 <sup>-6</sup> | 1.68 x 10 <sup>-5</sup> | 3.19 x 10 <sup>-5</sup> | 7.84 x 10 <sup>-5</sup> | 7.62 x 10 <sup>-6</sup> |
| 58               | 67/C     | 2.2                | T2   N2   III   III                                 | N      | Post | 6.75 x 10 <sup>-2</sup>  | 6.45 x 10 <sup>-6</sup> | 1.57 x 10 <sup>-5</sup> | 1.04 x 10 <sup>-4</sup> | 8.54 x 10 <sup>-5</sup> | 7.51 x 10 <sup>-6</sup> |
| 59               | 78/C     | 8.0                | T4   N0   III   III                                 | -      | Post | 7.98 x 10 <sup>-2</sup>  | 3.87 x 10 <sup>-5</sup> | 1.73 x 10 <sup>-5</sup> | 2.25 x 10 <sup>-6</sup> | 7.50 x 10 <sup>-5</sup> | 7.01 x 10 <sup>-5</sup> |
| 60               | 48/C     | 3.2                | T2   N1   -   II                                    | -      | Pre  | 1.75 x 10 <sup>-5</sup>  | 6.00 x 10 <sup>-6</sup> | 1.19 x 10 <sup>-5</sup> | 1.58 x 10 <sup>-6</sup> | 1.67 x 10 <sup>-4</sup> | 7.78 x 10 <sup>-6</sup> |
| 61               | 69/C     | 4.0                | T2   N0   III   II                                  | Y      | Post | 4.20 x 10 <sup>-2</sup>  | 8.60 x 10 <sup>-6</sup> | 8.74 x 10 <sup>-6</sup> | 1.76 x 10 <sup>-6</sup> | 7.15 x 10 <sup>-5</sup> | 8.12 x 10 <sup>-6</sup> |
| <b>Mean ± SD</b> |          |                    |                                                     |        |      | <b>Geometric Mean MF</b> |                         |                         |                         |                         |                         |
| 55.2 ± 11.5      |          |                    |                                                     |        |      | 2.15 x 10 <sup>-5</sup>  | 7.94 x 10 <sup>-6</sup> | 3.47 x 10 <sup>-5</sup> | 3.57 x 10 <sup>-6</sup> | 2.54 x 10 <sup>-5</sup> | 1.19 x 10 <sup>-5</sup> |

**Table S1D.** *PIK3CA*, *KRAS*, *HRAS*, and *BRAF* mutant fraction measurements in HR+/HER2- (TNBC) ductal carcinomas

| ID               | Age/Race | Max. Tumor<br>Dim. | T Stage   N Stage  <br>Hist. Grade   Clinical Stage |   | Smoker | MP                      | Mutant Fraction          |                         |                         |                         |                         |                         |
|------------------|----------|--------------------|-----------------------------------------------------|---|--------|-------------------------|--------------------------|-------------------------|-------------------------|-------------------------|-------------------------|-------------------------|
|                  |          |                    |                                                     |   |        |                         | <i>PIK3CA</i>            |                         | <i>KRAS</i>             |                         | <i>HRAS</i>             | <i>BRAF</i>             |
|                  |          |                    |                                                     |   |        |                         | H1047R                   | E545K                   | G12D                    | G12V                    | G12D                    | V600E                   |
| 62               | 64/C     | 1.8                | T1   N2   III   III                                 | - | Post   | 4.44 x 10 <sup>-4</sup> | 4.25 x 10 <sup>-5</sup>  | 3.63 x 10 <sup>-6</sup> | 2.75 x 10 <sup>-6</sup> | 3.48 x 10 <sup>-5</sup> | 3.64 x 10 <sup>-5</sup> |                         |
| 63               | 38/C     | 2.2                | T2   N0   III   II                                  | Y | Pre    | 1.17 x 10 <sup>-8</sup> | 7.89 x 10 <sup>-6</sup>  | 3.26 x 10 <sup>-6</sup> | 1.86 x 10 <sup>-7</sup> | 1.85 x 10 <sup>-5</sup> | 2.18 x 10 <sup>-3</sup> |                         |
| 64               | 45/C     | 1.8                | T1   N0   III   I                                   | - | -      | 4.31 x 10 <sup>-8</sup> | 6.01 x 10 <sup>-6</sup>  | 3.86 x 10 <sup>-6</sup> | 1.41 x 10 <sup>-6</sup> | 7.83 x 10 <sup>-6</sup> | 1.66 x 10 <sup>-5</sup> |                         |
| 65               | 80/?     | 4.2                | T2   N1   II   II                                   | Y | Post   | 3.15 x 10 <sup>-4</sup> | 4.58 x 10 <sup>-2</sup>  | 6.28 x 10 <sup>-5</sup> | 1.31 x 10 <sup>-7</sup> | 4.01 x 10 <sup>-4</sup> | 1.25 x 10 <sup>-4</sup> |                         |
| 66               | 54/C     | 2.2                | T2   N0   III   II                                  | Y | Post   | 7.66 x 10 <sup>-8</sup> | 7.11 x 10 <sup>-6</sup>  | 2.90 x 10 <sup>-5</sup> | 3.25 x 10 <sup>-8</sup> | 1.72 x 10 <sup>-5</sup> | 8.07 x 10 <sup>-5</sup> |                         |
| 67               | 70/C     | 2.7                | T2   N1   III   II                                  | - | -      | 4.67 x 10 <sup>-8</sup> | 9.42 x 10 <sup>-6</sup>  | 1.19 x 10 <sup>-5</sup> | 1.30 x 10 <sup>-6</sup> | 1.44 x 10 <sup>-5</sup> | 1.90 x 10 <sup>-5</sup> |                         |
| 68               | 52/C     | 3.0                | T2   N0   III   II                                  | Y | Post   | 1.05 x 10 <sup>-6</sup> | 6.49 x 10 <sup>-6</sup>  | 8.33 x 10 <sup>-6</sup> | 1.70 x 10 <sup>-7</sup> | 1.45 x 10 <sup>-5</sup> | 3.96 x 10 <sup>-5</sup> |                         |
| 69               | 52/C     | 1.7                | T1   N0   I   I                                     | N | Post   | 9.28 x 10 <sup>-7</sup> | 1.13 x 10 <sup>-5</sup>  | 3.32 x 10 <sup>-5</sup> | 1.19 x 10 <sup>-6</sup> | 5.56 x 10 <sup>-5</sup> | 6.10 x 10 <sup>-6</sup> |                         |
| 70               | 48/C     | 1.8                | T1   N0   II   I                                    | N | Pre    | 7.94 x 10 <sup>-8</sup> | 3.63 x 10 <sup>-6</sup>  | 1.47 x 10 <sup>-5</sup> | 1.23 x 10 <sup>-7</sup> | 1.12 x 10 <sup>-5</sup> | 5.03 x 10 <sup>-6</sup> |                         |
| 71               | 55/C     | 3.0                | T2   N-   II   II                                   | N | Post   | 3.23 x 10 <sup>-8</sup> | 8.05 x 10 <sup>-7</sup>  | 1.07 x 10 <sup>-5</sup> | 5.09 x 10 <sup>-8</sup> | 3.18 x 10 <sup>-5</sup> | 1.05 x 10 <sup>-5</sup> |                         |
| 72               | 45/C     | 1.8                | T1   N0   III   I                                   | - | Pre    | 2.40 x 10 <sup>-8</sup> | 2.95 x 10 <sup>-6</sup>  | 1.72 x 10 <sup>-5</sup> | 1.59 x 10 <sup>-6</sup> | 1.98 x 10 <sup>-5</sup> | 5.25 x 10 <sup>-5</sup> |                         |
| 73               | 67/C     | 1.5                | T1   N2   III   III                                 | - | Post   | 1.60 x 10 <sup>-4</sup> | 2.02 x 10 <sup>-5</sup>  | 6.37 x 10 <sup>-6</sup> | 4.85 x 10 <sup>-6</sup> | 6.89 x 10 <sup>-5</sup> | 1.91 x 10 <sup>-5</sup> |                         |
| 74               | 40/C     | 1.1                | T2   N0   III   II                                  | - | Pre    | 2.57 x 10 <sup>-4</sup> | 1.52 x 10 <sup>-4</sup>  | 1.49 x 10 <sup>-5</sup> | 4.25 x 10 <sup>-6</sup> | 1.15 x 10 <sup>-5</sup> | 1.01 x 10 <sup>-5</sup> |                         |
| 75               | 54/C     | 1.3                | T1   N1   III   II                                  | - | Post   | 1.54 x 10 <sup>-6</sup> | 5.33 x 10 <sup>-4</sup>  | 1.27 x 10 <sup>-5</sup> | 3.25 x 10 <sup>-6</sup> | 1.11 x 10 <sup>-5</sup> | 1.16 x 10 <sup>-5</sup> |                         |
| 76               | 67/C     | 3.5                | T2   N0   III   II                                  | Y | Post   | 1.04 x 10 <sup>-7</sup> | 5.89 x 10 <sup>-6</sup>  | 2.03 x 10 <sup>-5</sup> | 1.62 x 10 <sup>-6</sup> | 3.73 x 10 <sup>-5</sup> | 7.46 x 10 <sup>-6</sup> |                         |
| 77               | 74/C     | 2.2                | T2   N0   III   II                                  | - | Post   | 1.29 x 10 <sup>-7</sup> | 5.15 x 10 <sup>-6</sup>  | 1.16 x 10 <sup>-5</sup> | 1.42 x 10 <sup>-6</sup> | 6.33 x 10 <sup>-5</sup> | 6.86 x 10 <sup>-6</sup> |                         |
| 78               | 59/His.  | -                  | T-   N-   -   -                                     | - | -      | 1.46 x 10 <sup>-6</sup> | 1.43 x 10 <sup>-5</sup>  | 1.60 x 10 <sup>-5</sup> | 3.03 x 10 <sup>-6</sup> | 2.94 x 10 <sup>-5</sup> | 7.53 x 10 <sup>-6</sup> |                         |
| 79               | 49/C     | 3.4                | T2   N0   III   II                                  | Y | -      | 4.16 x 10 <sup>-6</sup> | 1.08 x 10 <sup>-5</sup>  | 7.44 x 10 <sup>-6</sup> | 9.67 x 10 <sup>-7</sup> | 1.35 x 10 <sup>-4</sup> | 7.88 x 10 <sup>-6</sup> |                         |
| 80               | 62/C     | 3.8                | T2   N0   III   II                                  | Y | -      | 6.07 x 10 <sup>-7</sup> | 1.43 x 10 <sup>-5</sup>  | 8.95 x 10 <sup>-6</sup> | 1.70 x 10 <sup>-6</sup> | 5.66 x 10 <sup>-5</sup> | 7.87 x 10 <sup>-6</sup> |                         |
| 81               | 43/C     | 4.0                | T2   N0   III   II                                  | - | -      | 9.53 x 10 <sup>-8</sup> | 7.54 x 10 <sup>-6</sup>  | 1.32 x 10 <sup>-5</sup> | 7.51 x 10 <sup>-6</sup> | 2.23 x 10 <sup>-4</sup> | 7.50 x 10 <sup>-6</sup> |                         |
| <b>Mean ± SD</b> |          |                    |                                                     |   |        |                         | <b>Geometric Mean MF</b> |                         |                         |                         |                         |                         |
| 55.90 ± 11.6     |          |                    |                                                     |   |        |                         | 7.64 x 10 <sup>-7</sup>  | 1.68 x 10 <sup>-5</sup> | 1.18 x 10 <sup>-5</sup> | 8.57 x 10 <sup>-7</sup> | 3.34 x 10 <sup>-5</sup> | 1.96 x 10 <sup>-5</sup> |

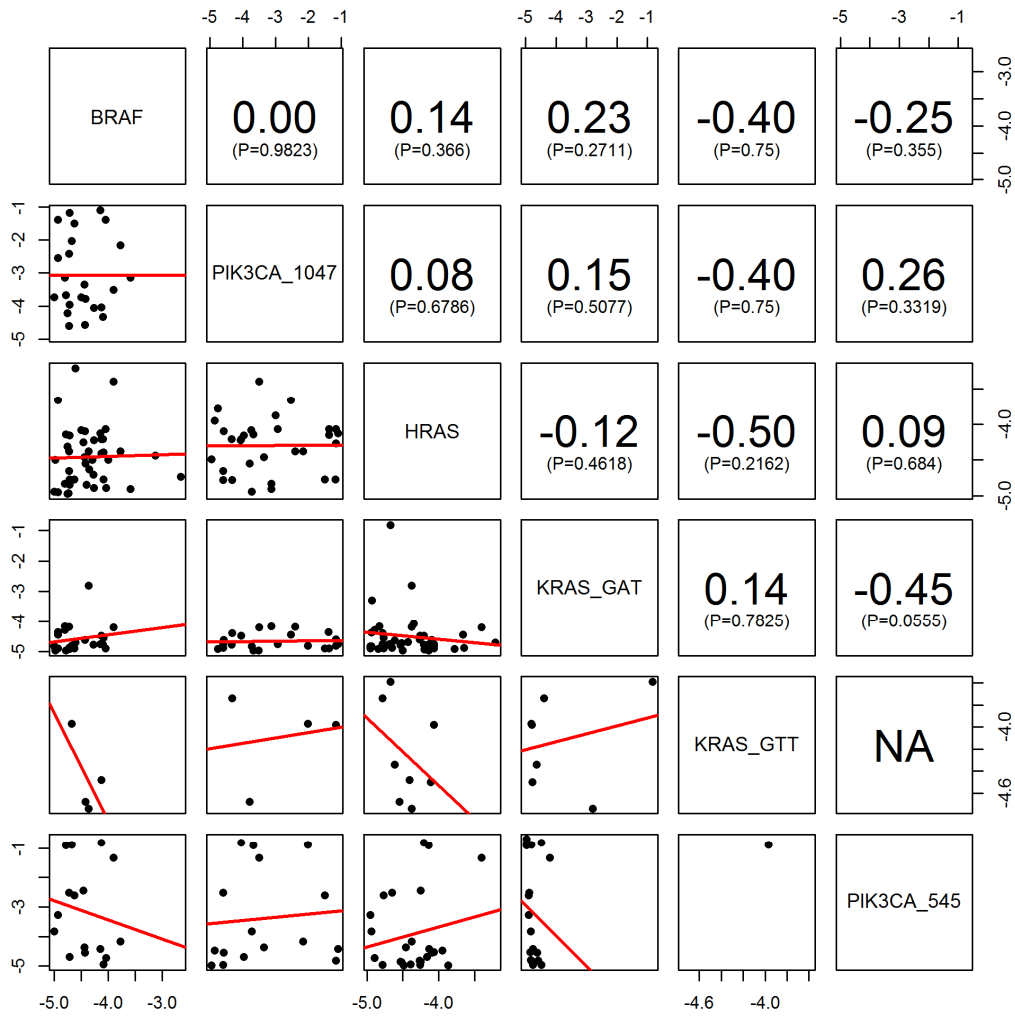

**Figure S1A.** Correlation matrix of MFs in ductal carcinomas: *PIK3CA* H1047R (*PIK3CA\_1047*) and E545K (*PIK3CA\_545*), *KRAS* G12D (*KRAS\_GAT*) and G12V (*GTT*), *HRAS* G12D (*HRAS*), and *BRAF* V600E (*BRAF*).

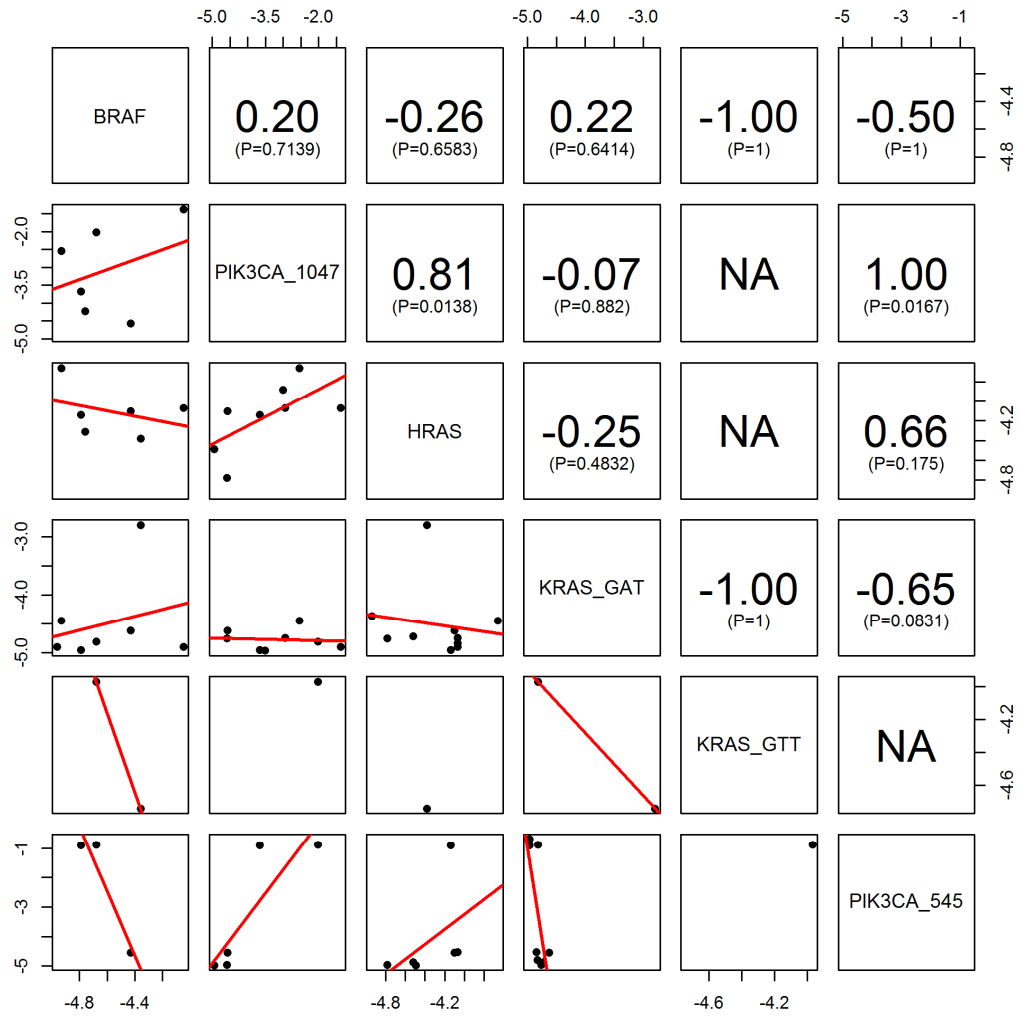

**Figure S1B.** Correlation matrix of MFs in HR+/HER2+ ductal carcinomas: *PIK3CA* H1047R (*PIK3CA\_1047*) and E545K (*PIK3CA\_545*), *KRAS* G12D (*KRAS\_GAT*) and G12V (*GTT*), *HRAS* G12D (*HRAS*), and *BRAF* V600E (*BRAF*).

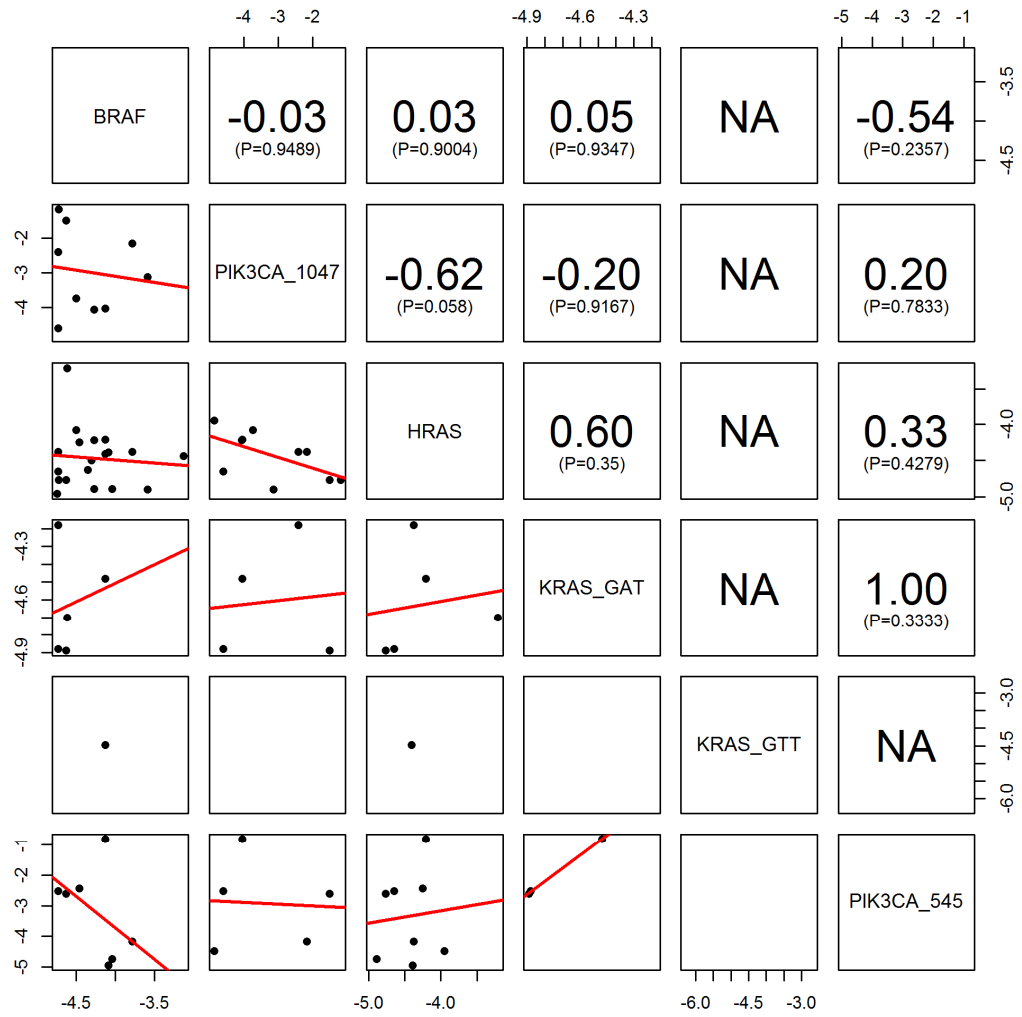

**Figure S1C.** Correlation matrix of MFs in HR+/HER2- ductal carcinomas: *PIK3CA* H1047R (*PIK3CA\_1047*) and E545K (*PIK3CA\_545*), *KRAS* G12D (*KRAS\_GAT*) and G12V (*GTT*), *HRAS* G12D (*HRAS*), and *BRAF* V600E (*BRAF*).



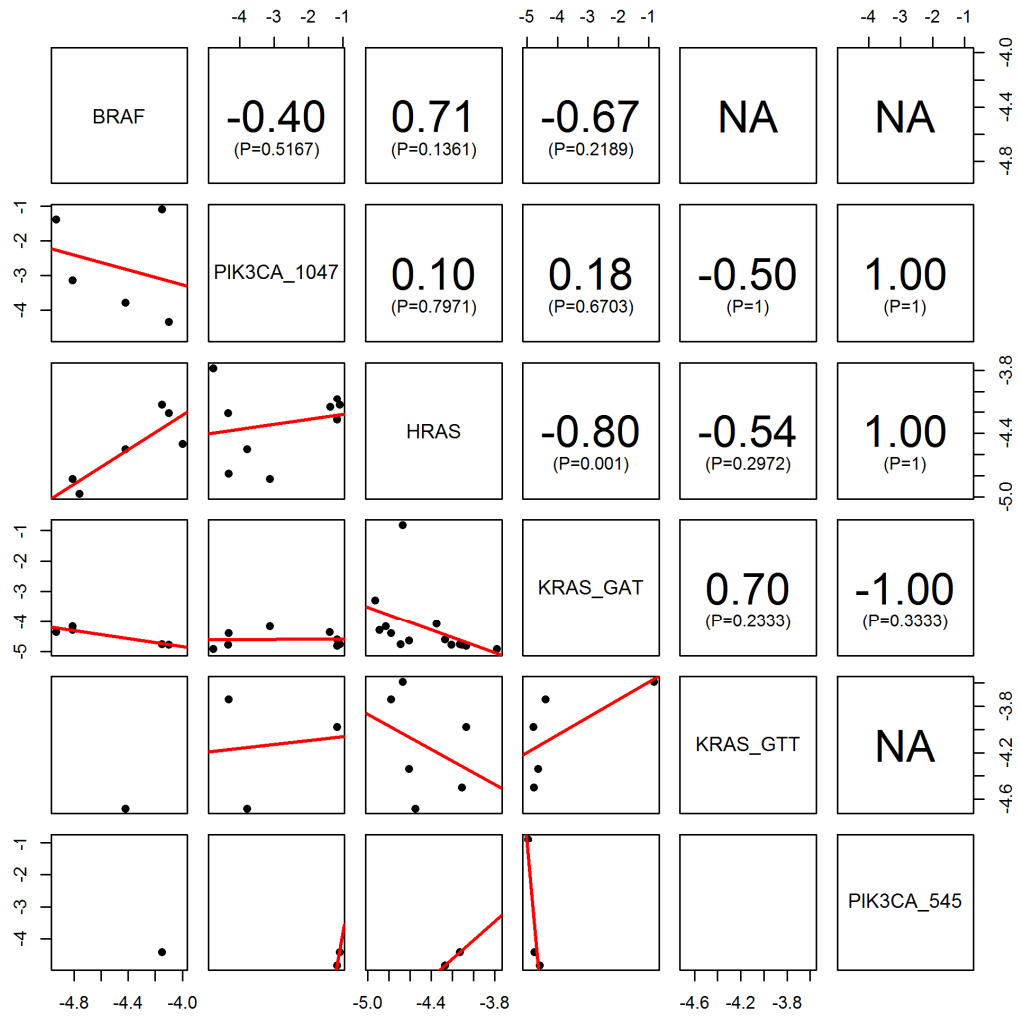

**Figure S1D.** Correlation matrix of MFs in HR-/HER2+ ductal carcinomas: *PIK3CA* H1047R (*PIK3CA\_1047*) and E545K (*PIK3CA\_545*), *KRAS* G12D (*KRAS\_GAT*) and G12V (*GTT*), *HRAS* G12D (*HRAS*), and *BRAF* V600E (*BRAF*).

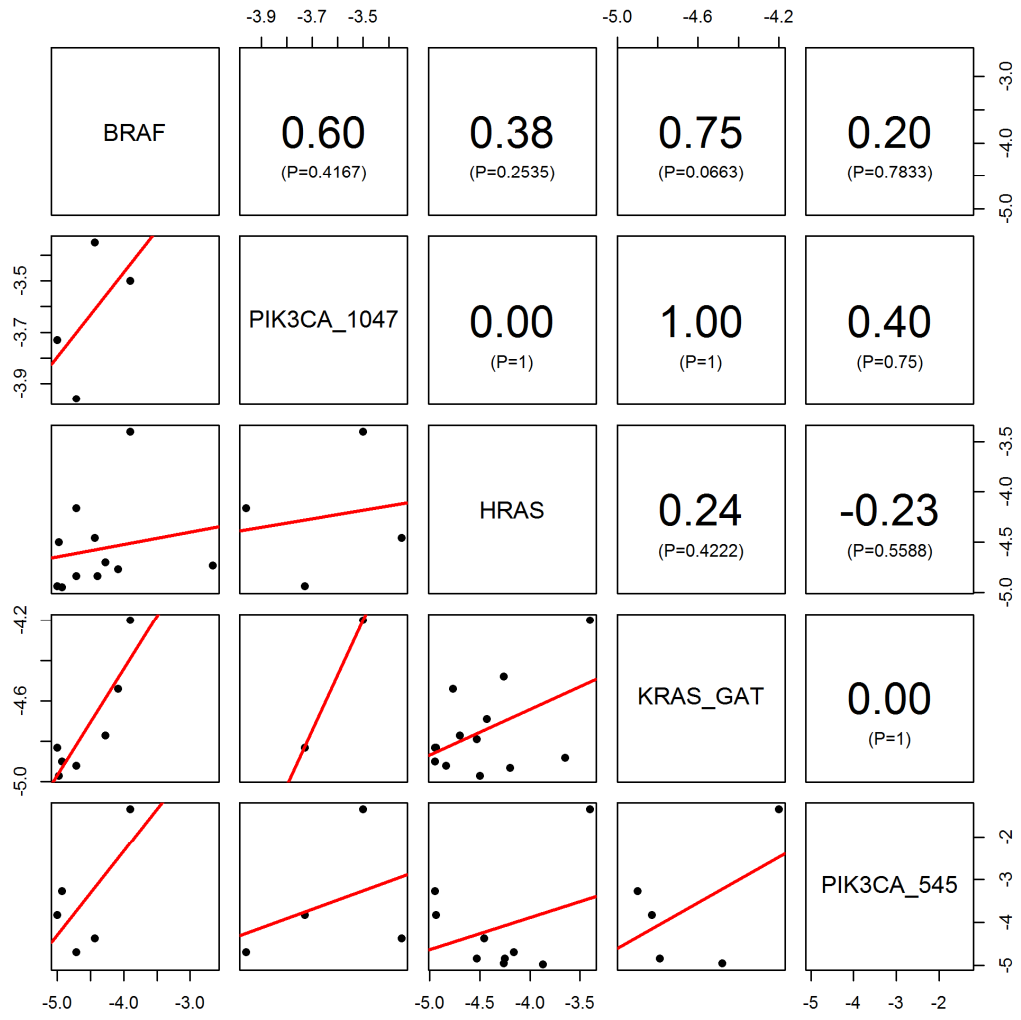

**Figure S1E.** Correlation matrix of MFs in HR-/HER2- (TNBC) ductal carcinomas: *PIK3CA* H1047R (*PIK3CA\_1047*) and E545K (*PIK3CA\_545*), *KRAS* G12D (*KRAS\_GAT*) and G12V (GTT), *HRAS* G12D (*HRAS*), and *BRAF* V600E (*BRAF*).

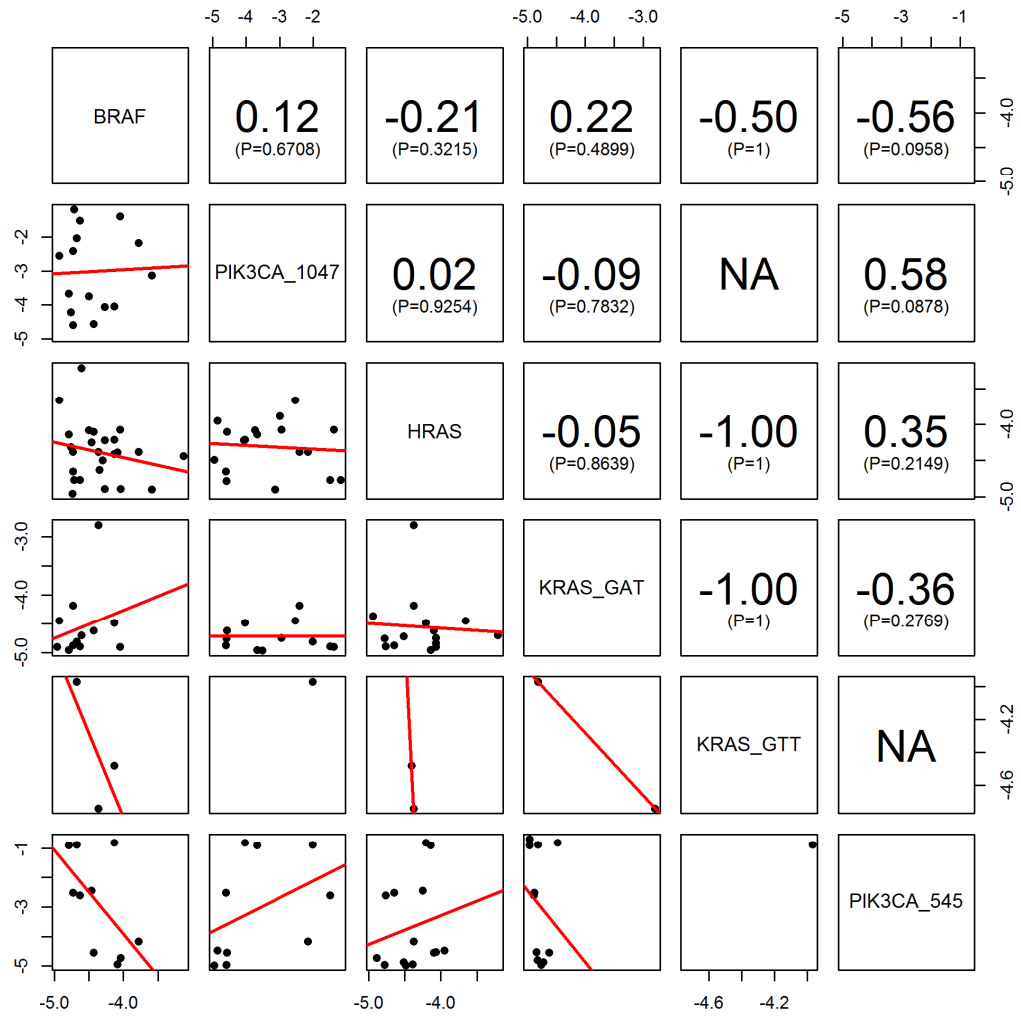

**Figure S1F.** Correlation matrix of MFs in ER+ ductal carcinomas: *PIK3CA* H1047R (*PIK3CA\_1047*) and E545K (*PIK3CA\_545*), *KRAS* G12D (*KRAS\_GAT*) and G12V (*GTT*), *HRAS* G12D (*HRAS*), and *BRAF* V600E (*BRAF*).

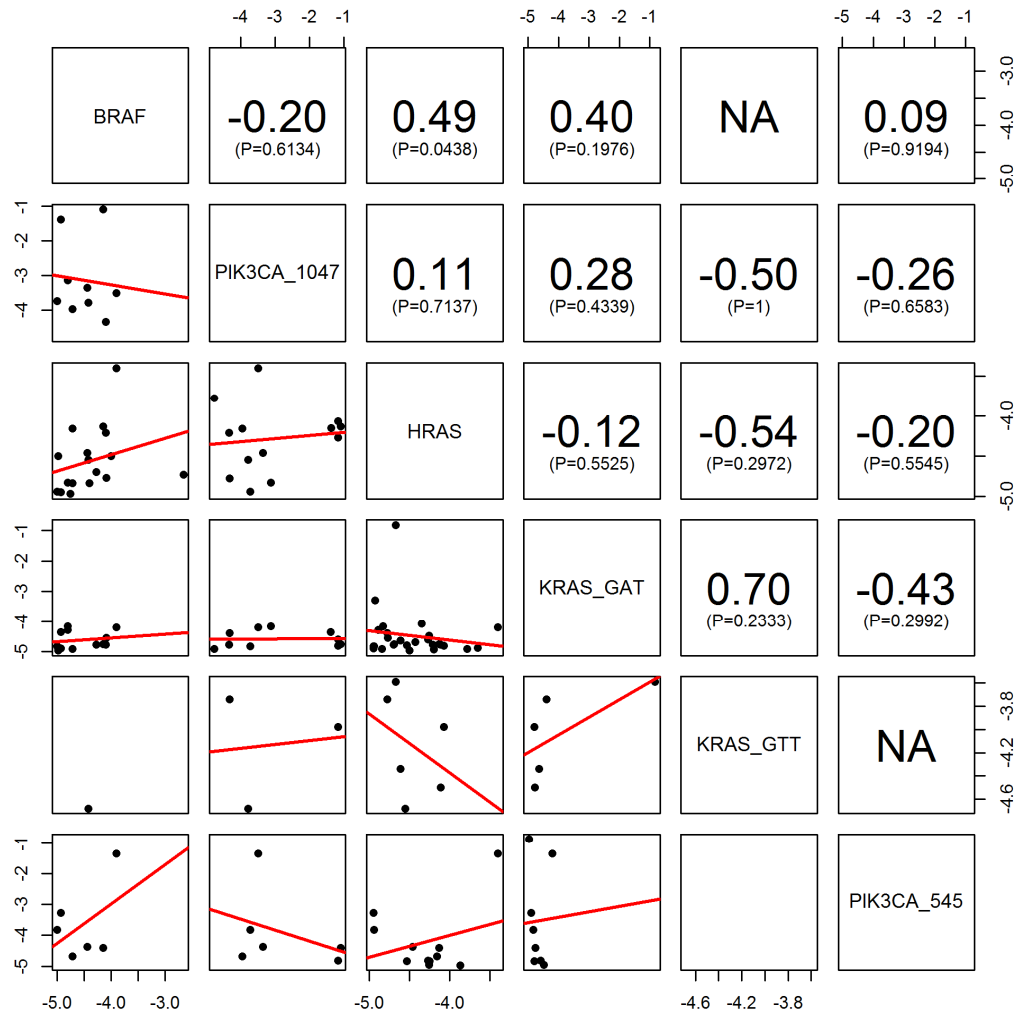

**Figure S1G.** Correlation matrix of MFs in ER- ductal carcinomas: *PIK3CA* H1047R (*PIK3CA\_1047*) and E545K (*PIK3CA\_545*), *KRAS* G12D (*KRAS\_GAT*) and G12V (*GTT*), *HRAS* G12D (*HRAS*), and *BRAF* V600E (*BRAF*).

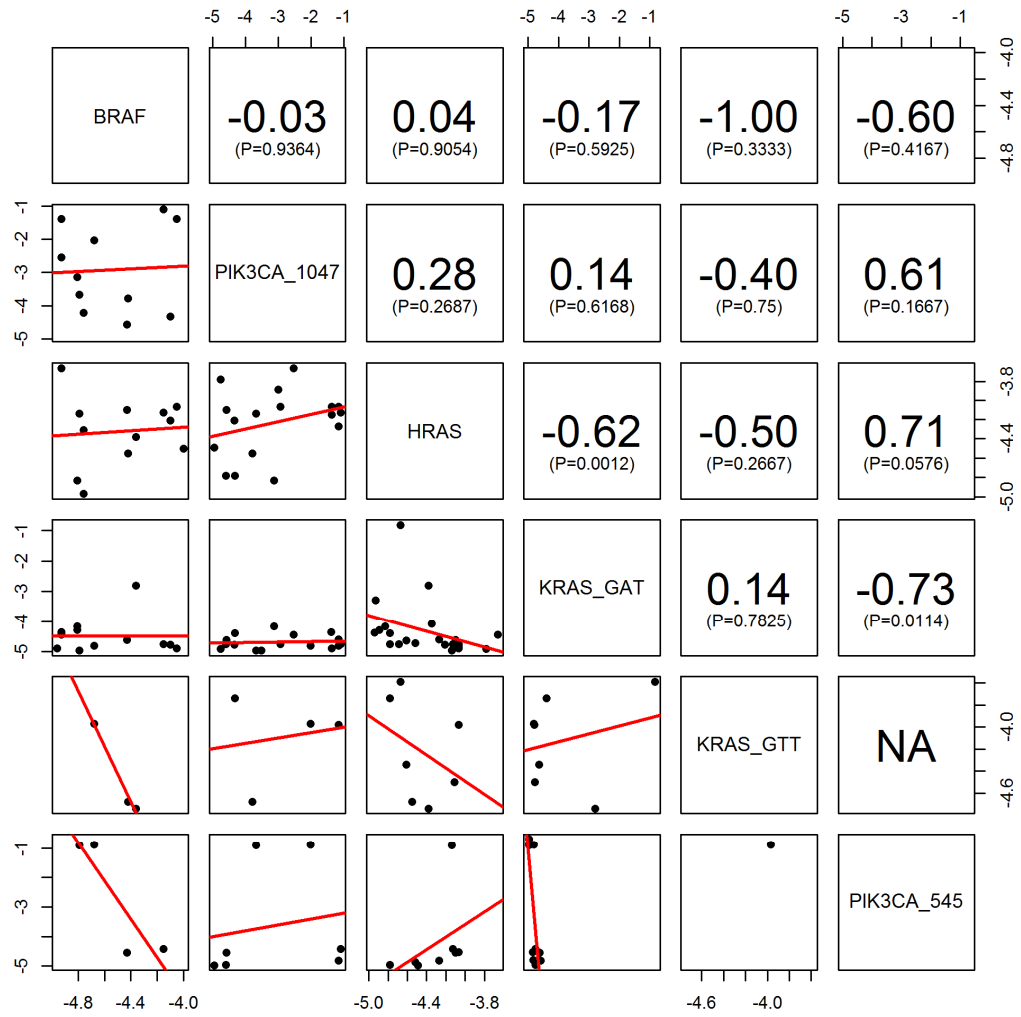

**Figure S1H.** Correlation matrix of MFs in HER2+ ductal carcinomas: *PIK3CA* H1047R (*PIK3CA\_1047*) and E545K (*PIK3CA\_545*), *KRAS* G12D (*KRAS\_GAT*) and G12V (*GTT*), *HRAS* G12D (*HRAS*), and *BRAF* V600E (*BRAF*).

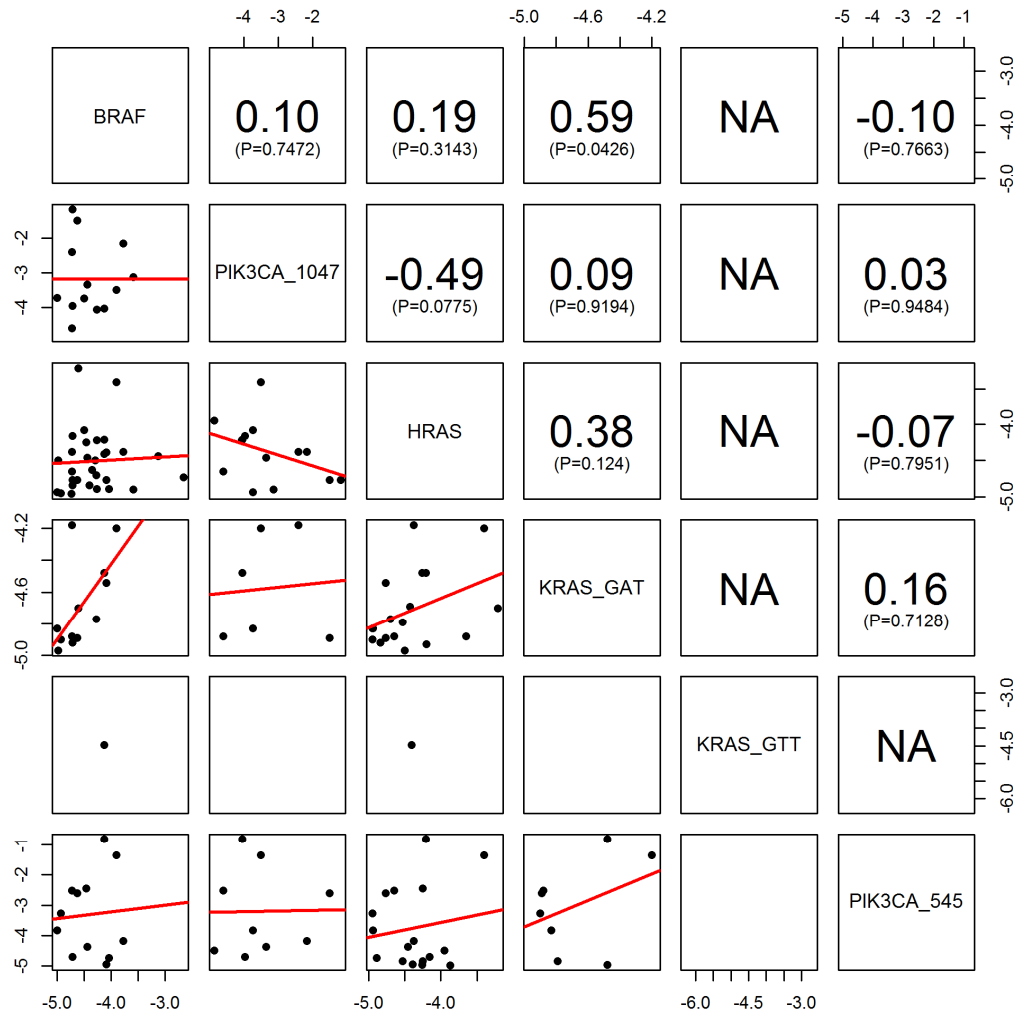

**Figure S11.** Correlation matrix of MFs in HER2- ductal carcinomas: *PIK3CA* H1047R (*PIK3CA\_1047*) and E545K (*PIK3CA\_545*), *KRAS* G12D (*KRAS\_GAT*) and G12V (*GTT*), *HRAS* G12D (*HRAS*), and *BRAF* V600E (*BRAF*).
